1 Title: Breathlessness and the body: Neuroimaging evidence for the inferential leap

2 Olivia K Faull<sup>1,2</sup>, Anja Hayen<sup>1,2</sup>, Kyle T S Pattinson<sup>1,2</sup>

3

4 <sup>1</sup>FMRIB Centre and <sup>2</sup>Nuffield Division of Anesthetics, Nuffield Department of Clinical  
5 Neurosciences, University of Oxford, Oxford, UK

6

7

8

9

10 **Corresponding author:**

11 Dr Olivia Faull

12 Nuffield Department of Clinical Neurosciences

13 University of Oxford

14 Oxford, UK

15 Email: [olivia.faul@ndcn.ox.ac.uk](mailto:olivia.faul@ndcn.ox.ac.uk)

16 Phone: +44 (0)1865 34544

17 Fax: +44 (0)1865 23079

18

19

20 **Abstract**

21 Breathlessness debilitates millions of people with chronic illness. Mismatch between  
22 breathlessness severity and objective disease markers is common and poorly  
23 understood. Traditionally, sensory perception was conceptualised as a stimulus-  
24 response relationship, although this cannot explain how conditioned symptoms may  
25 occur in the absence of physiological signals from the lungs or airways. A Bayesian  
26 model is now proposed in which the brain generates sensations based on expectations  
27 learned from past experiences (priors), which are then checked against incoming  
28 afferent signals. In this model, psychological factors may act as moderators. They may  
29 either alter priors, or change the relative attention towards incoming sensory  
30 information, leading to more variable interpretation of an equivalent afferent input.

31 In the present study we conducted a preliminary test of this model in a  
32 supplementary analysis of previously published data (Hayen 2017). We hypothesised  
33 that individual differences in psychological traits (anxiety, depression, anxiety sensitivity)  
34 would correlate with the variability of subjective evaluation of equivalent breathlessness  
35 challenges. To better understand the resulting inferential leap in the brain, we explored  
36 whether these behavioural measures correlated with activity in areas governing either  
37 prior generation or sensory afferent input.

38 Behaviorally, anxiety sensitivity was found to positively correlate with each  
39 subject's variability of intensity and unpleasantness during mild breathlessness, and  
40 with unpleasantness during strong breathlessness. In the brain, anxiety sensitivity was  
41 found to positively correlate with activity in the anterior insula during mild  
42 breathlessness, and negatively correlate with parietal sensorimotor areas during strong  
43 breathlessness.

44 Our findings suggest that anxiety sensitivity may reduce the robustness of this  
45 Bayesian sensory perception system, increasing the variability of breathlessness  
46 perception and possibly susceptibility to symptom misinterpretation. These preliminary  
47 findings in healthy individuals demonstrate how differences in psychological function  
48 influence the way we experience bodily sensations, which might direct us towards better  
49 understanding of symptom mismatch in clinical populations.

50

51 Key words: fMRI, breathlessness, symptoms, anxiety

52 **Introduction**

53

54 *“If the doors of perception were cleansed everything would appear to man as it is,*  
55 *infinite.*

56 *For man has closed himself up till he sees all things thro’ narrow chinks of his cavern.”*

57 WILLIAM BLAKE, *The Marriage of Heaven and Hell*

58

59 The perception of bodily sensation is integral to the management of self within the  
60 environment. One frightening and debilitating perception is that of breathlessness, when  
61 breathing is perceived as inadequate and a threat to life. Breathlessness is experienced  
62 across a range of illnesses <sup>1,2</sup>, including lung disease, heart disease and cancer.  
63 Breathlessness is notorious in that symptoms often are out of proportion to objective  
64 markers of disease <sup>3-7</sup>. While perceptual systems have traditionally been considered to  
65 encompass a stimulus followed by the brain’s response, this relationship cannot explain  
66 the often-observed dissociation between perception and symptom extent, with extreme  
67 cases manifesting as medically unexplained symptoms <sup>8,9</sup>. As it is the perception of  
68 symptoms that leads to their debilitating consequences, an overhaul is required in the  
69 way we consider the brain’s interaction with incoming sensory information. This would  
70 lead to better ways to understand and then treat unpleasant perceptions such as  
71 breathlessness.

72 With a launch into the Bayesian tidal wave of modern neuroscience <sup>10-15</sup>, recent  
73 theories have proposed a comprehensive model of symptom perception <sup>16,17</sup>. An  
74 important development of this model is the inclusion of a set of perceptual expectations,  
75 or ‘doors of perception’ in the words of William Blake. These perceptual ‘priors’ are  
76 neural representations of a distribution of expected values, which may be separated  
77 from the afferent neural inputs. Both priors and afferent sensory information can  
78 influence perception, which encompasses a range of probable perceptions (posterior  
79 distribution). Enhanced confidence in expectations (narrow, sharp priors) can increase  
80 their weight in the model, pulling the resulting perception away from the physiology and  
81 towards the prior. Furthermore, perceptual moderators exist within this system, such as

82 anxiety<sup>18-20</sup>, attention<sup>21-23</sup> or interoceptive ability<sup>24-27</sup>, which may adjust either the prior  
83 expectations or incoming sensory information to influence perception. For instance,  
84 perception may be shifted to be higher or lower than the sensation, or there may be a  
85 greater range of possible perception values (widened distribution), which increases their  
86 ambiguity and susceptibility to misinterpretation and misclassification as a potential  
87 threat.

88 The 'inferential leap' to reconcile expectation and neural sensory information and  
89 form conscious perception occurs in the brain<sup>17</sup>. One seductive theory consists of a  
90 division between agranular cortices (such as the anterior cingulate cortex and anterior  
91 insula) that generate prediction signals, and granular cortices (such as the primary  
92 sensory cortex and posterior insula), which compare afferent signals with predictions to  
93 generate prediction errors<sup>16,28,29</sup>. It is hypothesized that behavioural factors such as  
94 decreased or redirected attention could also reduce the gain of sensory information  
95 within granular cortices<sup>30</sup>, thereby diminishing the prediction error by increasing the  
96 relative weight of the priors in the model<sup>16,30</sup>. Alternatively, behavioural influences may  
97 reduce the gain of the prior within agranular cortices<sup>16</sup> to reduce prediction errors and  
98 influence perception.

99 In this short report we have firstly investigated whether behavioural scores of  
100 anxiety, depression and anxiety sensitivity relate to the distribution of subjective scores  
101 (posterior perceptual distribution) of experimentally induced breathlessness. Mild and  
102 strong breathlessness were indicated by a conditioned stimulus (a shape presented on  
103 a screen), and implemented after a short anticipation period. Both levels of  
104 breathlessness were considered, as sensory afferents may be more vague or indefinite  
105 during mild breathlessness stimuli and might thus rely more heavily on priors. To do this  
106 we have undertaken a supplementary analysis on previously unreported aspects of a  
107 recently published study<sup>31</sup>, to explore where in the brain these perceptual moderators  
108 act to alter perception.

109

110

111

## 112 **Materials and Methods**

113 This study aimed to characterise functional brain activity during perception of a  
114 conditioned mild and strong breathlessness stimuli in 19 healthy participants (10  
115 females, mean age  $\pm$  SD,  $24 \pm 7$  years). An account of conditioned responses to strong  
116 breathlessness has been published previously<sup>31</sup>, while the mild breathlessness stimulus  
117 was not considered due to its large between-subject variability. In the current report we  
118 have undertaken a more detailed evaluation of how behavioural measures relate to  
119 subjective stimulus perceptions in the mild condition, and where in the brain these  
120 perceptions may be modulated. Please see Hayen et al. (2017)<sup>31</sup> for a complete  
121 description of data acquisition and the lower level functional magnetic resonance  
122 imaging (fMRI) analysis. The study of Hayen et al. was a double-blinded placebo-  
123 controlled study of the effect of an opioid (remifentanil) on breathlessness, but in the  
124 present paper we are only considering the placebo condition (infusion of 0.9% saline).

125

### 126 *Behavioural questionnaires*

127 The Center for Epidemiologic Studies Depression Scale (CES-D<sup>32</sup>) was used to identify  
128 (and exclude) participants with clinical depression. The trait scale of the Spielberger  
129 State-Trait Anxiety Inventory (STAI<sup>33</sup>) was used to characterize general participant  
130 anxiety. The Anxiety Sensitivity Index (ASI<sup>34</sup>) was used to differentiate sensitivity to  
131 symptoms of anxiety in the form of bodily perceptions.

132

### 133 *Conditioned breathlessness and functional brain scanning*

134 Scanning was conducted using a 3 Tesla Siemens Trio scanner, with physiological  
135 monitoring and control of end-tidal gases (see Hayen et al., 2017<sup>31</sup>). Briefly, an  
136 aversive delay-conditioning session was performed outside of the scanner, followed by  
137 two fMRI sessions on consecutive days (remifentanil or saline placebo, counterbalanced  
138 across participants). Participants learned associations between three visual cues and  
139 three respiratory sensations during the conditioning session, which were mild  
140 breathlessness, strong breathlessness or no breathlessness (unloaded breathing). The  
141 breathlessness stimulus used in this study was intermittent resistive inspiratory loading

142 for 30 to 60 seconds, administered via an MRI compatible breathing system <sup>31</sup>.  
143 Expiration was unrestricted via a one-way valve (Hans Rudolph, Shawnee, Kansas,  
144 USA). The stimuli were each presented four times during the scanning session in a  
145 semi-randomised, counterbalanced order, with a preceding anticipation period followed  
146 by a resistive loading stimulus (where appropriate). Immediately following each  
147 stimulus, participants were asked to rate both the intensity and unpleasantness of the  
148 preceding load on a visual analogue scale (VAS: 0-100%).

149

### 150 *Behavioural and fMRI analysis*

151 In this short report we will only consider the fMRI session with the saline infusion. Full  
152 details on analysis procedures have been previously reported <sup>31</sup>, and involved robust  
153 physiological noise correction of fMRI images. Whilst former analyses examined mean  
154 brain responses to anticipation and breathlessness (and the changes induced by  
155 remifentanyl), the focus of this analysis was to explore how behavioural measures relate  
156 to the mean and variability of breathlessness perceptions in each subject, and to any  
157 corresponding changes in brain activity.

158 Mean and variability (standard deviation) of mouth pressure, subjective intensity  
159 and unpleasantness during scanning for both mild and strong loading were calculated  
160 for each subject. A full correlation matrix was then created on all behavioural and  
161 physiological variables, including questionnaires, mouth pressure and subjective  
162 breathlessness scores for each level of loading. As the behavioural variable of ASI  
163 score was shown to significantly correlate with trial-by-trial variation (standard deviation)  
164 of subjective scores, the group fMRI analysis previously reported <sup>31</sup> was adjusted to  
165 include a group mean and ASI score regressor. This analysis aimed to identify where  
166 functional brain activity correlates with differences in ASI score and thus extent of  
167 perceptual variability across subjects during saline administration, using whole-brain  
168 correction for multiple comparisons in FSL (FMRIB's Software Library,  
169 [www.fmrib.ox.ac.uk/fsl](http://www.fmrib.ox.ac.uk/fsl)).

170

171

172 **Results**

173

174 *Behavioural correlation matrix*

175 Trait anxiety and depression were highly correlated across subjects, but neither  
176 correlated with ASI score (Figure 1). No behavioural scores (depression, trait anxiety or  
177 anxiety sensitivity) were found to significantly correlate with mean inspiratory pressure  
178 or subjective breathlessness VAS scores of intensity or unpleasantness for either mild  
179 or strong breathlessness conditions (Figure 1). When behavioural scores were  
180 compared to variability (standard deviation) in physiology and subjective scores, ASI  
181 was found to significantly correlate with variation in unpleasantness during both mild  
182 and strong breathlessness, and intensity with mild breathlessness (Figures 1 and 3).  
183 Both trait anxiety and depression were strongly correlated with the variation in pressure  
184 trace during strong (but not mild) breathlessness, but not subjective scores.

185 When mean subjective breathlessness scores and physiology were compared,  
186 average pressure, subjective intensity and unpleasantness were all strongly correlated  
187 during mild breathlessness (Figure 1). However, during strong breathlessness, intensity  
188 and unpleasantness scores became even more strongly correlated while ‘de-coupling’  
189 from measures of inspiratory pressure. Lastly, while variation in intensity and  
190 unpleasantness scores were correlated during mild breathlessness, neither was  
191 reflective of variation in inspiratory pressure for either level of breathlessness.

192

193 *Average brain activity during anticipation and breathlessness*

194 Conditioned associations between visual stimuli and breathlessness stimuli were  
195 confirmed prior to scanning in all subjects. Group mean brain activity during strong  
196 anticipation and breathlessness have been previously reported<sup>31</sup>. No significant mean  
197 activity was observed during anticipation of mild breathlessness, and brain activity  
198 during mild and strong breathlessness is illustrated in Figure 2.

199

200 *Perceptual variation during mild breathlessness*

201 During mild breathlessness, the extent of perceptual variation in subjective scores of  
202 both breathlessness intensity ( $r = 0.406$ ,  $p = 0.048$ ) and unpleasantness ( $r = 0.547$ ,  $p =$   
203  $0.010$ ) were correlated with ASI score. When ASI score was subsequently investigated  
204 as a modulator of brain activity during mild breathlessness, it was found to correlate with  
205 brain activity in the left anterior insula only (Figure 3). No significant activity was found to  
206 correlate with ASI score during anticipation of mild breathlessness.

207

### 208 *Perceptual variation during strong breathlessness*

209 During strong breathlessness, the extent of perceptual variation in subjective scores of  
210 breathlessness unpleasantness was correlated with ASI score ( $r = 0.528$ ,  $p = 0.012$ ).  
211 Variation in breathlessness intensity no longer correlated with ASI score ( $r = 0.001$ ,  $p =$   
212  $0.443$ ). ASI score was found to negatively correlate with activity in the posterior insula  
213 cortex, primary and secondary somatosensory cortices, primary motor cortex, dorsal  
214 anterior cingulate cortex, lateral occipital cortex and the precuneus cortex (Figure 3). No  
215 significant brain activity was found to correlate with ASI score during anticipation of  
216 strong breathlessness.

217

## 218 **Discussion**

219 In this study we have shown that the greater an individual's anxiety sensitivity index  
220 (ASI) score, the greater the variability in breathlessness scores to a set of standardised  
221 breathlessness challenges. Furthermore, during mild breathlessness, ASI score was  
222 found to correlate with brain activity in the anterior insula. Conversely, during strong  
223 breathlessness, ASI score was inversely correlated with activity in parietal primary  
224 sensorimotor cortices.

225 The extent of negative emotions such as anxiety and depression have long been  
226 considered potential modulators of perception<sup>18,19,21,23,25,35</sup>. However, in healthy  
227 populations these scores may not be sensitive enough to identify a potential role in the  
228 interoceptive sensations of breathlessness. In contrast, anxiety sensitivity is a measure  
229 of alertness or sensitivity to bodily sensations of anxiety, and worry about the  
230 consequences of those sensations<sup>34</sup>. Interestingly, in this report we have shown that it



231 is an individual's anxiety sensitivity that correlates with the extent of their variability in  
232 perceived breathlessness, and not generalized trait anxiety or depression. This attention  
233 and vigilance towards bodily sensations might thus render symptoms more ambiguous  
234 and susceptible to misinterpretation. Comparatively, trait anxiety and depression instead  
235 correlated with mouth pressure variability during strong breathlessness, indicating that  
236 participants with high trait anxiety might have modulated their breathing to avert  
237 negative sensations, and actively mediate the relationship between symptoms and  
238 expected perception.

239 Numerous previous studies have used a range of breathlessness stimuli to  
240 investigate where breathlessness symptoms are processed in the brain<sup>31,36-41</sup>. What we  
241 have learned is that an extensive network of sensorimotor, affective and stimulus  
242 valuation areas are all highly active during breathlessness, as it is such a multi-  
243 dimensional experience<sup>6,7,42,43</sup>. Moving forward, the challenge involves teasing apart  
244 where expectations (priors) and neural sensory information meet within this network to  
245 allow inference and perception. While studies using conditioned breathlessness cues  
246 can help us to understand the generation of priors<sup>44</sup>, in this report we additionally  
247 investigated the perceptual variability around a repeated stimulus to probe how  
248 behavioural measures of anxiety, depression and anxiety sensitivity may be influencing  
249 the distribution of breathlessness scores, and where in the brain this may occur.

250 Within the Bayesian framework, the final perception of symptoms such as  
251 breathlessness is represented by a set of probable breathlessness values (posterior  
252 distribution). Psychological traits such as anxiety sensitivity could either interact with  
253 expectations, or with incoming sensory information to alter this posterior distribution<sup>17</sup>.  
254 As this Bayesian system strives for efficiency, it aims to minimize the differences  
255 between prior expectations and afferent sensory information (prediction errors)<sup>28</sup>. This  
256 could occur either by changing prior expectations, or reducing the importance (gain) of  
257 sensory neural information to lessen prediction errors. It has been elegantly  
258 hypothesized that aspects of this Bayesian framework may be somewhat anatomically  
259 distinct within the brain. Specifically, prior generation and predictions occur within the  
260 deep layers of agranular cortices such as anterior cingulate cortex and anterior insula

261 <sup>16,17,28,29</sup>, which are comprised of many projection neurons connected to granular  
262 cortices <sup>29,45-47</sup>. Granular cortices, such as the primary sensory cortex and posterior  
263 insula, consist of well-differentiated layers including granule cells in layer IV that amplify  
264 thalamic sensory inputs <sup>48-50</sup>.

265 In the current study, participants were conditioned to associate an abstract cue  
266 with upcoming mild or strong breathlessness. This learnt association allows the  
267 generation of breathlessness expectations, and we were then able to investigate where  
268 in the brain the behavioural anxiety sensitivity interacts with brain activity. During mild  
269 breathlessness, we observed a correlation with activity in the anterior insula (agranular),  
270 which has been previously implicated in prior generation within an interoceptive  
271 prediction system <sup>16</sup>. Conversely, during strong breathlessness, anxiety sensitivity was  
272 inversely correlated with granular cortices such as the posterior insula and primary  
273 sensory cortex <sup>29,51,52</sup>. Therefore, it is possible that anxiety sensitivity interacts within  
274 this Bayesian framework at either the level of the prior or at the level of receiving  
275 afferent inputs to the system, depending on the level of intensity of the stimulus. As  
276 anxiety sensitivity represents attention towards bodily sensations, it is possible that  
277 down-weighting priors and concentrating attention towards afferent sensation makes  
278 this system less robust, and as a result creates a wider posterior perceptual distribution.  
279 Comparatively, during stronger (and less ambiguous) breathlessness, anxiety sensitivity  
280 correlates only with perceptual variation of unpleasantness, but no longer intensity. The  
281 corresponding changes in granular cortex may represent modulation of the gain of  
282 afferent information, attempting to bring sensations closer to priors to reduce prediction  
283 errors.

284

### 285 *Clinical Relevance*

286 The current study has been carried out in healthy volunteers with no history of  
287 respiratory disease. Studying healthy populations can aid us in understanding normal  
288 variants in physiology, psychology and perception. Still, the challenge remains to apply  
289 these concepts to clinical populations. If an individual suffers from chronic  
290 breathlessness, they may (over time) alter their priors and thus change their perception.

291 This may result in a shift of the prior further from the neural sensory information (a  
292 leftward or rightward shift of the prior illustration in Figure 4). It remains to be  
293 investigated how this change in expectation within the course of chronic disease may be  
294 influenced by pre-existing behavioural levels of anxiety, depression and anxiety  
295 sensitivity. This could help to explain how treatment options such as pulmonary  
296 rehabilitation for chronic obstructive pulmonary disease (COPD) may be addressing  
297 these expectations of breathlessness<sup>53</sup> and determine in which populations and under  
298 what conditions such measures would be expected to work best. Using the Bayesian  
299 framework to link relevant baseline measures of anxiety and interoceptive sensitivity to  
300 neural activation within clinical populations could also help to understand and address  
301 maladaptive perceptual differences, e.g. dangerous ‘under-’ and ‘over-’ perception of  
302 symptoms in asthma sufferers.

303

304

### 305 *Limitations*

306 This study is a supplementary analysis of previously published work, representing  
307 preliminary pilot data in healthy volunteers with small study numbers ( $n = 19$ ) and  
308 limited stimulus repetitions ( $n = 4$  each for mild and strong breathlessness). Whilst  
309 previously published research has demonstrated both improved<sup>54</sup> and worsened<sup>55</sup>  
310 respiratory perceptual accuracy with greater anxiety, the current results showed no  
311 effect of trait anxiety on perception. Rather, we have observed a relationship between  
312 anxiety sensitivity and perceptual variation. While anxiety sensitivity represents a  
313 separate facet of anxiety constrained to bodily sensations<sup>34</sup>, numerous other variables  
314 may also contribute to differences with previously published results. These factors may  
315 include the continuous ratings used in this study compared to categorical ratings used  
316 previously<sup>56</sup>, the relatively low trait anxiety values of the study subjects (mean  $34 \pm 9$   
317 (SD), compared to previous classifications of low (29) and high (55) trait anxiety<sup>57</sup>),  
318 and/or the small subject numbers and repeats employed.

319 This study was also unable to determine the location and shape of the prior in  
320 relation to both the sensory observation and resulting perceptual (posterior) distribution.

321 It is possible that anxiety sensitivity, anxiety and / or depression induce a lateral shift of  
322 the prior, and our assumed changes in prior shape are inferred from the resulting  
323 changes in perceptual variation. It is clear that further work is required to explore the  
324 relationship between anxiety sensitivity and prior generation, and how this may change  
325 across a broad spectrum of generalized anxiety, to determine its place within the  
326 Bayesian symptom perception framework.

327

328

329

### 330 **Conclusions and future directions**

331 This short report is a preliminary insight into potential mechanisms of perceptual  
332 modulation of breathlessness within the Bayesian framework. Within this framework, the  
333 brain integrates prior expectations with afferent sensory information to create  
334 breathlessness perception. Behavioral modulators could potentially alter this  
335 relationship and influence subsequent perceptual distributions. Here, we have shown  
336 that level of anxiety sensitivity explains variations in breathlessness perception between  
337 healthy volunteers, possibly modifying both priors and afferent sensations, which are  
338 processed in distinct brain areas. Therefore, attention to bodily sensations (ASI) may  
339 reduce the robustness of this system in healthy individuals, and increase susceptibility  
340 to misinterpretation of breathlessness. Future work on larger cohorts needs to address  
341 the relationship between anxiety sensitivity, interoceptive accuracy/confidence and  
342 breathlessness perceptions, to investigate how both attention to bodily sensations and  
343 interoceptive abilities may interact to adjust the doors of symptom perception.

344

345

346

347

348

349

350

351 **Acknowledgements**

352 This research was supported by the Medical Research Council (UK). This research was  
353 further supported by the JABBS Foundation and the National Institute for Health  
354 Research, Oxford Biomedical Research Centre based at Oxford University Hospitals  
355 NHS Trust and University of Oxford. The authors would like to thank Omer Van Den  
356 Bergh for his thoughts and comments on the manuscript.

357

358

359 **Competing interests**

360 The authors declare no competing financial interests.

361

362

363

364 **References**

- 365 1. Solano JP, Gomes B, Higginson IJ. A Comparison of Symptom Prevalence in Far  
366 Advanced Cancer, AIDS, Heart Disease, Chronic Obstructive Pulmonary Disease  
367 and Renal Disease. *Journal of Pain and Symptom Management*. 2006;31(1):58-  
368 69. doi:10.1016/j.jpainsymman.2005.06.007.
- 369 2. Smoller JW, Pollack MH, Otto MW, Rosenbaum JF, Kradin RL. Panic anxiety,  
370 dyspnea, and respiratory disease: Theoretical and clinical considerations. *Am J*  
371 *Respir Crit Care Med*. 1996;154(1):6-17.
- 372 3. Mahler DA, Harver A, Lentine T, Scott JA, Beck K, Schwartzstein RM. Descriptors  
373 of breathlessness in cardiorespiratory diseases. *Am J Respir Crit Care Med*.  
374 1996;154(5):1357-1363. doi:10.1164/ajrccm.154.5.8912748.
- 375 4. Jones PW. Health status measurement in chronic obstructive pulmonary disease.  
376 *Thorax*. 2001;56(11):880-887. doi:10.1136/thorax.56.11.880.
- 377 5. Lansing RW, Gracely RH, Banzett RB. The multiple dimensions of dyspnea:  
378 Review and hypotheses. *Respiratory physiology & neurobiology*. 2009;167(1):53-  
379 60. doi:10.1016/j.resp.2008.07.012.
- 380 6. Herigstad M, Hayen A, Wiech K, Pattinson KTS. Dyspnoea and the brain.  
381 *Respiratory medicine*. 2011;105(6):809-817.
- 382 7. Hayen A, Herigstad M, Pattinson KTS. Understanding dyspnea as a complex  
383 individual experience. *Maturitas*. 2013;76(1):45-50.  
384 doi:10.1016/j.maturitas.2013.06.005.
- 385 8. Nimnuan C, Hotopf M, Wessely S. Medically unexplained symptoms - An  
386 epidemiological study in seven specialities. *J Psychosom Res*. 2001;51(1):361-  
387 367.
- 388 9. MD MLI, MACP DSPM. Medically Unexplained Symptoms. *Medical Clinics of NA*.  
389 2014;98(3):663-672. doi:10.1016/j.mcna.2014.01.013.
- 390 10. Geisler WS, Albrecht DG. Bayesian Analysis of Identification Performance in  
391 Monkey Visual Cortex: Nonlinear Mechanisms and Stimulus Certainty.  
392 *Ophthalmic Literature*. 1996.
- 393 11. Friston KJ, Penny W, Phillips C, Kiebel S, Hinton G. Classical and Bayesian  
394 inference in neuroimaging: theory. *NeuroImage*. 2002.
- 395 12. Ma WJ, Beck JM, Latham PE, Pouget A. Bayesian inference with probabilistic  
396 population codes. *Nat Neurosci*. 2006;9(11):1432-1438. doi:10.1038/nn1790.

- 397 13. Miyazaki M, Yamamoto S, Uchida S, Kitazawa S. Bayesian calibration of  
398 simultaneity in tactile temporal order judgment. *Nat Neurosci.* 2006;9(7):875-877.  
399 doi:10.1038/nn1712.
- 400 14. O'Reilly JX, Woolrich MW, Behrens TEJ, Smith SM, Johansen-Berg H. Tools of  
401 the trade: psychophysiological interactions and functional connectivity. *Social*  
402 *Cognitive and Affective Neuroscience.* 2012;7(5):604-609.  
403 doi:10.1093/scan/nss055.
- 404 15. Colombo M, Seriès P. Bayes in the brain—on Bayesian modelling in neuroscience.  
405 *The British Journal for the Philosophy of Science.* 2012;63(3):697-723.  
406 doi:10.1093/bjps/axr043.
- 407 16. Barrett LF, Simmons WK. Interoceptive predictions in the brain. *Nat Rev Neurosci.*  
408 2015;16(7):419-429. doi:10.1038/nrn3950.
- 409 17. Van den Bergh O, Witthöft M, Petersen S, Brown RJ. Symptoms and the body:  
410 Taking the inferential leap. *Neuroscience & Biobehavioral Reviews.* 2017;74(Part  
411 A):185-203. doi:10.1016/j.neubiorev.2017.01.015.
- 412 18. Spinhoven P, vanPeskiOosterbaan AS, VanderDoes A, Willems L, Sterk PJ.  
413 Association of anxiety with perception of histamine induced bronchoconstriction in  
414 patients with asthma. *Thorax.* 1997;52(2):149-152.
- 415 19. Tang J, Gibson S. A Psychophysical Evaluation of the Relationship Between Trait  
416 Anxiety, Pain Perception, and Induced State Anxiety. *The Journal of Pain.*  
417 2005;6(9):612-619. doi:10.1016/j.jpain.2005.03.009.
- 418 20. Bogaerts K, Notebaert K, Van Diest I, Devriese S, De Peuter S, Van den Bergh O.  
419 Accuracy of respiratory symptom perception in different affective contexts. *J*  
420 *Psychosom Res.* 2005;58(6):537-543. doi:10.1016/j.jpsychores.2004.12.005.
- 421 21. Merikle PM, Joordens S. Parallels between Perception without Attention and  
422 Perception without Awareness. *Consciousness and cognition.* 1997;6(2):219-236.  
423 doi:10.1006/ccog.1997.0310.
- 424 22. Ling S, Carrasco M. When sustained attention impairs perception. *Nat Neurosci.*  
425 2006;9(10):1243-1245. doi:10.1038/nn1761.
- 426 23. Phelps EA, Ling S, Carrasco M. Emotion facilitates perception and potentiates the  
427 perceptual benefits of attention. *Psychol Sci.* 2006;17(4):292-299.  
428 doi:10.1111/j.1467-9280.2006.01701.x.

429

430

- 431 24. Critchley HD, Eccles J, Garfinkel SN. Interaction between cognition, emotion, and  
432 the autonomic nervous system. In: *Autonomic Nervous System*. Vol 117.  
433 Handbook of Clinical Neurology. Elsevier; 2013:59-77. doi:10.1016/b978-0-444-  
434 53491-0.00006-7.
- 435 25. Mallorqui-Bague N, Bulbena A, Pailhez G, Garfinkel SN, Critchley HD. Mind-Body  
436 Interactions in Anxiety and Somatic Symptoms. *Harvard Review of Psychiatry*.  
437 2016;24(1):53-60. doi:10.1097/HRP.0000000000000085.
- 438 26. Gray MA, Harrison NA, Wiens S, Critchley HD. Modulation of Emotional Appraisal  
439 by False Physiological Feedback during fMRI. *PLoS ONE*. 2007;2(6):e546.  
440 doi:10.1371/journal.pone.0000546.t002.
- 441 27. Garfinkel SN, Tiley C, O'Keeffe S, Harrison NA, Seth AK, Critchley HD.  
442 Discrepancies between dimensions of interoception in autism: Implications for  
443 emotion and anxiety. *Biological Psychology*. 2016;114:117-126.  
444 doi:10.1016/j.biopsycho.2015.12.003.
- 445 28. Friston K. A theory of cortical responses. *Philosophical Transactions of the Royal  
446 Society B: Biological Sciences*. 2005;360(1456):815-836.  
447 doi:10.1098/rstb.2005.1622.
- 448 29. Shipp S, Adams RA, Friston KJ. Reflections on agranular architecture: predictive  
449 coding in the motor cortex. *Trends in Neurosciences*. 2013;36(12):706-716.  
450 doi:10.1016/j.tins.2013.09.004.
- 451 30. Feldman H, Friston KJ. Attention, Uncertainty, and Free-Energy. *Front Hum  
452 Neurosci*. 2010;4:1-23. doi:10.3389/fnhum.2010.00215.
- 453 31. Hayen A, Wanigasekera V, Faull OK, et al. Opioid suppression of conditioned  
454 anticipatory brain responses to breathlessness. *NeuroImage*. January 2017:1-44.  
455 doi:10.1016/j.neuroimage.2017.01.005.
- 456 32. Radloff LS. The CES-D scale a self-report depression scale for research in the  
457 general population. *Applied psychological measurement*. 1977;1(3):385-401.
- 458 33. Spielberger CD. *State-Trait Anxiety Inventory*. Hoboken, NJ, USA: John Wiley &  
459 Sons, Inc.; 2010. doi:10.1002/9780470479216.corpsy0943.
- 460 34. Reiss S, Peterson RA, Gursky DM, McNally RJ. Anxiety sensitivity, anxiety  
461 frequency and the prediction of fearfulness. *Behaviour research and therapy*.  
462 1986;24(1):1-8.
- 463 35. Klauenberg S, Maier C, Assion H-J, et al. Depression and changed pain  
464 perception: Hints for a central disinhibition mechanism. *Pain*. 2008;140(2):332-  
465 343. doi:10.1016/j.pain.2008.09.003.



- 466 36. Banzett RB, Lansing RW, Evans KC, Shea SA. Stimulus-response characteristics  
467 of CO<sub>2</sub>-induced air hunger in normal subjects. *Respiration Physiology*.  
468 1996;103(1):19-31. doi:10.1016/0034-5687(95)00050-X.
- 469 37. Banzett RB, Mulnier HE, Murphy K, Rosen SD, Wise RJ, Adams L.  
470 Breathlessness in humans activates insular cortex. *NeuroReport*.  
471 2000;11(10):2117-2120.
- 472 38. Banzett RB, Pedersen SH, Schwartzstein RM, Lansing RW. The Affective  
473 Dimension of Laboratory Dyspnea. *Am J Respir Crit Care Med*.  
474 2008;177(12):1384-1390. doi:10.1164/rccm.200711-1675OC.
- 475 39. Pattinson KTS, Governo RJ, MacIntosh BJ, et al. Opioids Depress Cortical  
476 Centers Responsible for the Volitional Control of Respiration. *Journal of*  
477 *Neuroscience*. 2009;29(25):8177-8186. doi:10.1523/JNEUROSCI.1375-09.2009.
- 478 40. Leupoldt von A, Dahme B. Differentiation between the sensory and affective  
479 dimension of dyspnea during resistive load breathing in normal subjects. *Chest*.  
480 2005;128(5):3345-3349. doi:10.1378/chest.128.5.3345.
- 481 41. Faull OK, Jenkinson M, Ezra M, Pattinson KTS. Conditioned respiratory threat in  
482 the subdivisions of the human periaqueductal gray. 2016;5.  
483 doi:10.7554/eLife.12047.
- 484 42. Schwartzstein RM, Manning HL, Weiss JW, Weinberger SE. Dyspnea - a Sensory  
485 Experience. *Lung*. 1990;168(4):185-199. doi:10.1007/BF02719692.
- 486 43. De Peuter S, Van Diest I, Lemaigre V, Verleden G, Demedts M, Van den Bergh O.  
487 Dyspnea: The role of psychological processes. *Clinical Psychology Review*.  
488 2004;24(5):557-581.
- 489 44. Herigstad M, Hayen A, Evans E, et al. Dyspnea-Related Cues Engage the  
490 Prefrontal Cortex. *Chest*. 2015;148(4):953-961. doi:10.1378/chest.15-0416.
- 491 45. Barbas H, Rempel-Clower N. Cortical structure predicts the pattern of  
492 corticocortical connections. *Cereb Cortex*. 1997;7(7):635-646.
- 493 46. Barbas H, Hilgetag CC. Rules relating connections to cortical structure in primate  
494 prefrontal cortex. *Neurocomputing*. 2002;44-46:301-308. doi:10.1016/S0925-  
495 2312(02)00356-9.
- 496 47. Barbas H. General Cortical and Special Prefrontal Connections: Principles from  
497 Structure to Function. *Annu Rev Neurosci*. 2015;38(1):269-289.  
498 doi:10.1146/annurev-neuro-071714-033936.

- 500 48. Herkenham M. Laminar Organization of Thalamic Projections to the Rat  
501 Neocortex. *Science*. 1980;207(4430):532-533.
- 502 49. Staiger JF, Flagmeyer I, Schubert D, Zilles K, Kötter R, Luhmann HJ. Functional  
503 diversity of layer IV spiny neurons in rat somatosensory cortex: quantitative  
504 morphology of electrophysiologically characterized and biocytin labeled cells.  
505 *Cereb Cortex*. 2004;14(6):690-701. doi:10.1093/cercor/bhh029.
- 506 50. Larkum M. A cellular mechanism for cortical associations: an organizing principle  
507 for the cerebral cortex. *Trends in Neurosciences*. 2012;36(3):1-11.  
508 doi:10.1016/j.tins.2012.11.006.
- 509 51. Evrard HC, Logothetis NK, Bud Craig AD. Modular architectonic organization of  
510 the insula in the macaque monkey. *J Comp Neurol*. 2013;522(1):64-97.  
511 doi:10.1002/cne.23436.
- 512 52. Kalia M, Mesulam M. Brain stem projections of sensory and motor components of  
513 the vagus complex in the cat: II. Laryngeal, tracheobronchial, pulmonary, cardiac,  
514 and gastrointestinal branches. *J Comp Neurol*. 1980;193(2):467-508.
- 515 53. Herigstad M, Faull O, Hayen A, et al. Treating the lungs via the brain:  
516 Mechanisms underpinning improvements in breathlessness with pulmonary  
517 rehabilitation. doi:10.1101/117390.
- 518 54. Petersen S, Leupoldt AV, Bergh OVD. Interoception and the uneasiness of the  
519 mind: affect as perceptual style. *Front Psychol*. 2015;6(2\_Suppl.):409–6.  
520 doi:10.3389/fpsyg.2015.01408.
- 521 55. Garfinkel SN, Manassei MF, Hamilton-Fletcher G, In den Bosch Y, Critchley HD,  
522 Engels M. Interoceptive dimensions across cardiac and respiratory axes. *Philos*  
523 *Trans R Soc Lond, B, Biol Sci*. 2016;371(1708):20160014–10.  
524 doi:10.1098/rstb.2016.0014.
- 525 56. Petersen S, Schroyen M, Mölders C, Zenker S, Van den Bergh O. Categorical  
526 interoception: perceptual organization of sensations from inside. *Psychol Sci*.  
527 2014;25(5):1059-1066. doi:10.1177/0956797613519110.
- 528 57. Koster EHW, Crombez G, Verschuere B, Van Damme S, Wiersema JR.  
529 Components of attentional bias to threat in high trait anxiety: Facilitated  
530 engagement, impaired disengagement, and attentional avoidance. *Behaviour*  
531 *research and therapy*. 2006;44(12):1757-1771. doi:10.1016/j.brat.2005.12.011.
- 532

533  
534  
535

Figures

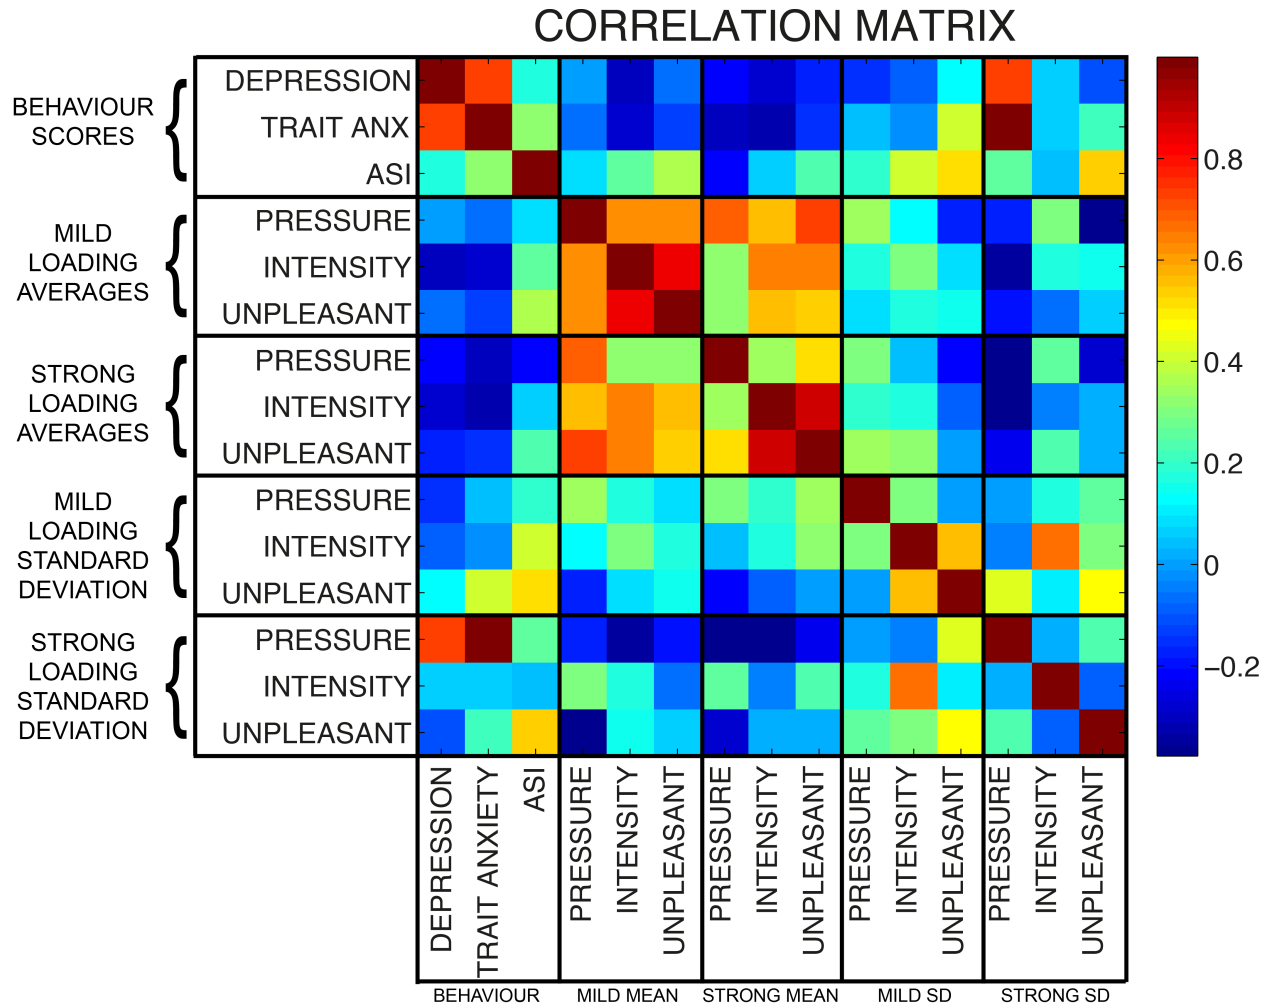

536  
537  
538  
539  
540  
541  
542

**Figure 1.** Full correlation matrix of all measured behavioural and physiological variables. Behavioural scores consisted of measures of depression, trait anxiety and anxiety sensitivity index (ASI). Mean and standard deviation measures of mouth pressure, intensity and unpleasantness scores are included for mild and strong resistive loading (breathlessness).

543  
544

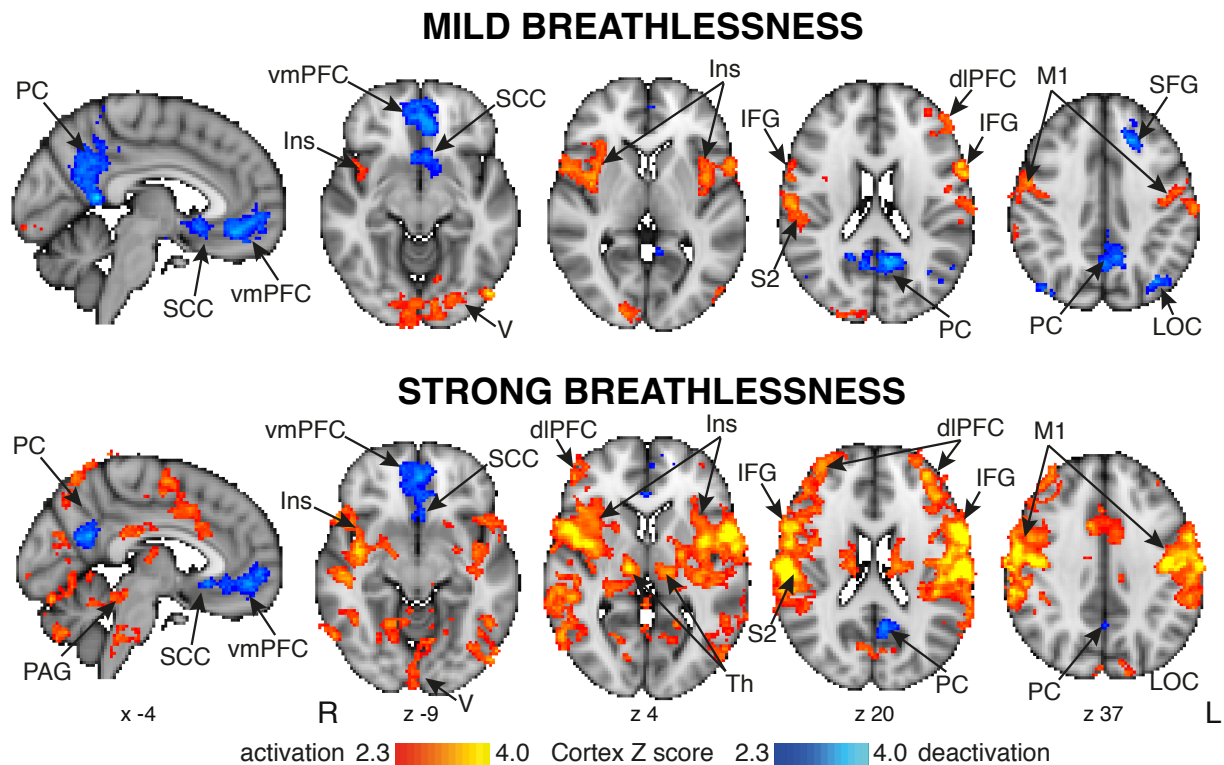

545 **Figure 2.** Mean BOLD changes identified during mild and strong breathlessness stimuli.  
546 The images consist of a colour-rendered statistical map superimposed on a standard  
547 (MNI 2x2x2 mm) brain. Significant regions are displayed with a threshold  $Z > 2.3$ , with a  
548 cluster probability threshold of  $p < 0.05$  (corrected for multiple comparisons).  
549 Abbreviations: vmPFC, ventromedial prefrontal cortex; dlPFC, dorsolateral prefrontal  
550 cortex; SCC, subcingulate cortex; Ins, insula; IFG, inferior frontal gyrus; SFG, superior  
551 frontal gyrus; M1, primary motor cortex; S2, secondary somatosensory cortex; PC,  
552 precuneus; Th, thalamus; LOC, lateral occipital cortex; PAG, periaqueductal gray.  
553  
554  
555

556  
557  
558  
559

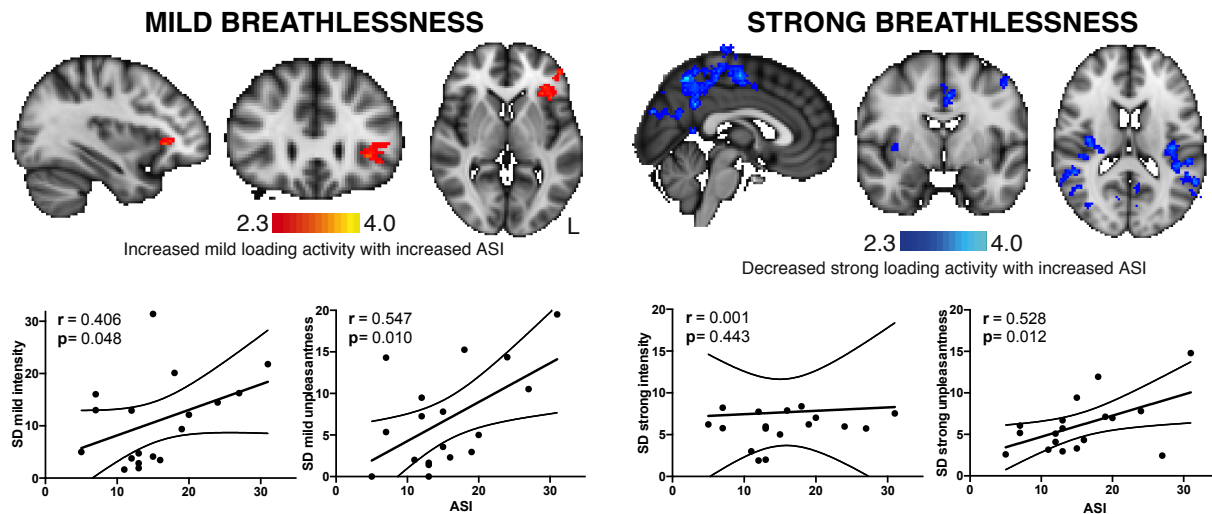

560  
561  
562  
563  
564  
565  
566  
567  
568  
569  
570  
571

**Figure 3.** Relationship between perceptual variation, behavioural ASI score and brain activity. Left: (Top) Brain activity in the anterior insula that correlates with ASI score, and (bottom) significant correlations between ASI score and variation (standard deviation) in both intensity and unpleasantness during mild breathlessness. Right: (Top) Brain activity in the posterior insula, primary motor and sensory cortices, precuneus and posterior cingulate cortex that negatively correlates with ASI score, and (bottom) significant correlation between ASI score and unpleasantness, but not intensity during strong breathlessness.

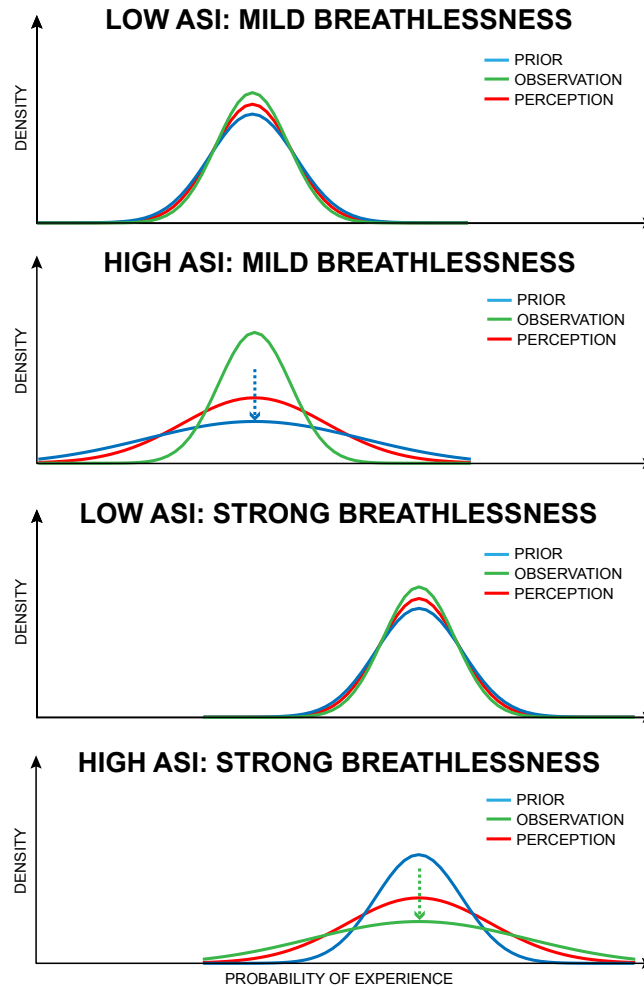

572  
573  
574  
575  
576  
577  
578  
579  
580  
581  
582

**Figure 4.** Theoretical possible relationships between ASI and posterior distribution of breathlessness perception using a Bayesian framework. Top two panels: Minimal influence of priors and sensory input (observation) on posterior distribution with low ASI, but flattened prior may widen posterior perceptual distribution with high ASI during mild breathlessness. Bottom two panels: Minimal influence of priors and sensory input (observation) on posterior distribution with low ASI, but flattened observation may widen posterior perceptual distribution with high ASI during strong breathlessness. Figure adapted from Van den Bergh et al. (2017).

583 Table 1. Effects of loading on respiratory parameters.  $P_{ET}CO_2$ =partial pressure of end-  
 584 tidal carbon dioxide.  $P_{ET}O_2$ =partial pressure of end-tidal oxygen. Values are presented  
 585 as mean (SD). N=19. Complete heart rate data in each epoch only available for 15  
 586 subjects.

587 \* = significantly different from saline unloaded breathing at  $p<0.001$ .

588 ¶ = significantly different from saline anticipation unloaded breathing at  $p<0.05$

| Variable                                      | Anticipation unloaded | Unloaded breathing | Anticipation mild | Mild loading | Anticipation strong | Strong loading |
|-----------------------------------------------|-----------------------|--------------------|-------------------|--------------|---------------------|----------------|
| Mouth pressure amplitude [cmH <sub>2</sub> O] | 2.7 (0.7)             | 2.4 (0.5)          | 2.6 (0.7)         | 4.0 (0.8)    | 3.5 (1.7)¶          | 12.7 (4.1)*    |
| $P_{ET}CO_2$ [kPa]                            | 5.5 (0.6)             | 5.6 (0.6)          | 5.6 (0.5)         | 5.5 (0.5)    | 5.5 (0.5)           | 5.5 (0.6)      |
| $P_{ET}O_2$ [kPa]                             | 20.0 (0.9)            | 19.8 (0.8)         | 19.8 (0.7)        | 20.2 (0.9)   | 19.9 (0.7)          | 20.2 (0.8)     |
| Intensity rating [%VAS]                       |                       | 12 (16)            |                   | 32 (21)      |                     | 71 (20)*       |
| Unpleasantness rating [%VAS]                  |                       | 10 (18)            |                   | 25 (25)      |                     | 61 (32)*       |
| Heart rate [min <sup>-1</sup> ] (N=15)        | 68 (11)               | 67 (10)            | 69 (9)            | 67 (12)      | 68 (11)             | 69 (11)        |
